# Supplementary material for: Better implant survival with modern ankle prosthetic designs: 1,226 total ankle prostheses followed for up to 20 years in the Swedish Ankle Registry
Source: PubMed Central journal article supplement (PMC7144194; doi:10.1080/17453674.2019.1709312), 2020-01-13
Supplement: IORT_A_1709312_SM0076.pdf [file IORT_A_1709312_SM0076.pdf]

## Supplementary data

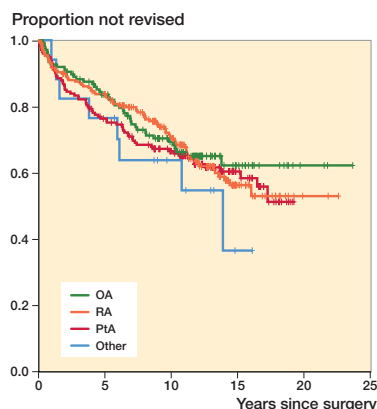

Figure 5. Estimated cumulative prosthetic survival per diagnosis. Number of patients still at risk of experiencing the primary endpoint and prosthetic survival with 95% CI per 5-year period are indicated in the life table.

| Years since surgery:                    | 5         | 10        | 15        | 20 |
|-----------------------------------------|-----------|-----------|-----------|----|
| Posttraumatic arthritis (PtA) (n = 441) |           |           |           |    |
| Number at risk                          | 243       | 106       | 31        |    |
| TAR survival                            | 0.82      | 0.73      | 0.65      |    |
| CI                                      | 0.78–0.86 | 0.68–0.78 | 0.57–0.73 |    |
| Rheumatoid arthritis (RA) (n = 401)     |           |           |           |    |
| Number at risk                          | 257       | 134       | 25        | 2  |
| TAR survival                            | 0.87      | 0.73      | 0.57      |    |
| CI                                      | 0.84–0.91 | 0.68–0.79 | 0.47–0.66 |    |
| Osteoarthritis (OA) (n = 291)           |           |           |           |    |
| Number at risk                          | 163       | 74        | 18        | 3  |
| TAR survival                            | 0.87      | 0.75      | 0.69      |    |
| CI                                      | 0.83–0.91 | 0.69–0.82 | 0.59–0.78 |    |
| Other <sup>a</sup> (n = 93)             |           |           |           |    |
| Number at risk                          | 44        | 11        | 1         |    |
| TAR survival                            | .76       | 0.65      |           |    |
| CI                                      | 0.66–0.86 | 0.48–0.81 |           |    |

<sup>a</sup> Including hemophilia, hemochromatosis and psoriatic arthritis

Table 4. Prosthetic survival rates from national registries and high volume units

| Study                          | Period of primary surgery | TAR (n) | Follow-up, years |     | Revisions (n) | TAR survival |         |         |                   |  |
|--------------------------------|---------------------------|---------|------------------|-----|---------------|--------------|---------|---------|-------------------|--|
|                                |                           |         | Mean             | Max |               | 5-year       | 10-year | 15-year | 20-year           |  |
| Registry studies               |                           |         |                  |     |               |              |         |         |                   |  |
| Fevang et al. 2007             | 1994–2005                 | 257     | 3                | 12  | 27            | 0.89         | 0.76    |         |                   |  |
| Henricson et al. 2007          | 1993–2005                 | 531     |                  |     | 101           | 0.78         |         |         |                   |  |
| Henricson et al. 2011b         | 1993–2010                 | 780     | 6                | 10  | 168           | 0.81         | 0.69    |         |                   |  |
| Skytta et al. 2010             | 1997–2006                 | 515     | 3                | 10  | 59            | 0.83         |         |         |                   |  |
| Hosman et al. 2007             | 2000–2005                 | 202     | 2                | 6   | 14            | 0.86         |         |         |                   |  |
| http://www.nzoa.org.nz         | 2000–2017                 | 728     |                  | 11  | 50            |              | 0.83    |         |                   |  |
| Undén et al. 2019 <sup>a</sup> | 1993–2016                 | 1,226   | 7                | 24  | 268           | 0.85         | 0.74    | 0.63    | 0.58              |  |
| Non-registry studies           |                           |         |                  |     |               |              |         |         |                   |  |
| Barg et al. 2013               | 2000–2010                 | 722     | 6                | 10  | 61            | 0.94         | 0.84    |         |                   |  |
| Bonnin et al. 2011             | 1997–2000                 | 98      | 9                | 11  | 12            |              | 0.85    |         |                   |  |
| Clough et al. 2019             | 1993–2000                 | 200     | 16               | 24  | 32            | 0.90         | 0.83    | 0.76    |                   |  |
| Frigg et al. 2017              | 1996–2006                 | 50      | 15               | 16  | 12            |              | 0.78    | 0.70    | 0.55 <sup>b</sup> |  |
| Kerkhoff et al. 2016           | 1999–2008                 | 134     |                  | 15  | 20            |              | 0.78    |         |                   |  |
| Koivu et al. 2017a             | 1997–2002                 | 34      |                  | 17  | 15            | 0.94         | 0.87    | 0.64    |                   |  |
| Mann et al. 2011               | 1998–2000                 | 84      | 9                | 11  | 9             | 0.96         | 0.90    |         |                   |  |
| Palanca et al. 2018            | 1998–2000                 | 84      | 16               | 18  | 15            |              |         | 0.73    |                   |  |
| Wood and Deakin 2003           | 1993–2000                 | 200     | 7                | 13  | 24            | 0.93         | 0.80    |         |                   |  |

<sup>a</sup> Current study

<sup>b</sup> At 19 years
